# Supplementary material for: Factors Affecting Intensive Aflibercept Treatment Response in Diabetic Macular Edema: A Real-World Study
Source: Hindawi journal article supplement (doi:10.1155/2023/1485059), 2023-07-18
Supplement: f1 [file 1485059.f1.pdf]

**Supplementary Table 1. Cutoff values and odds ratio of the significant factors for suboptimal treatment response**

|                                    | Cutoff value | OR   | P-value |
|------------------------------------|--------------|------|---------|
| DM duration (years)                | 15           | 9.33 | 0.011*  |
| eGFR (mL/min/1.73 m <sup>2</sup> ) | 80           | 7.35 | 0.046*  |
| Serum Cr (mg/dL)                   | 0.95         | 7.33 | 0.026*  |
| Serum K (mmol/L)                   | 4.70         | 5.87 | 0.041*  |
| ERM                                |              | 9.75 | 0.014*  |

\* Statistically significant ( $p < 0.05$ ) in the logistic regression analysis

OR, odds ratio; DM, diabetes mellitus; eGFR, estimated glomerular filtration rates; Cr, creatinine; K, potassium; ERM, epiretinal membrane
